# Supplementary material for: Engineering mesenchymal stromal/stem cell-derived extracellular vesicles with improved targeting and therapeutic efficiency for the treatment of central nervous system disorders
Source: PubMed Central journal article supplement — Neural Regen Res. 2020 Jun 19;15(12):2235–6. doi: 10.4103/1673-5374.284982 (PMC7749490; doi:10.4103/1673-5374.284982), 2020-06-19
Supplement: NRR-15-2235_Suppl1.pdf [file NRR-15-2235_Suppl1.pdf]

## OPEN PEER REVIEW REPORT 1

**Name of journal:** Neural Regeneration Research

**Manuscript NO:** NRR-D-20-00001

**Title:** Engineering mesenchymal stromal/stem cell-derived extracellular vesicles with improved targeting and therapeutic efficiency for the treatment of central nervous system disorders

**Reviewer's Name:** Mitsuhiro Enomoto

**Reviewer's country:** Japan

**Date sent for review:** 2020-02-18

### COMMENTS TO AUTHORS

This manuscript described a possible treatment with MSC derived extracellular vesicles for CNS disorders. This clearly shows their roles and engineering to enhance their efficacies for treatment of injured or degenerative nerve tissues.

It will be great if a schema includes to explain cell engineering in the review.
