# Supplementary material for: Engineering mesenchymal stromal/stem cell-derived extracellular vesicles with improved targeting and therapeutic efficiency for the treatment of central nervous system disorders
Source: PubMed Central journal article supplement — Neural Regen Res. 2020 Jun 19;15(12):2235–6. doi: 10.4103/1673-5374.284982 (PMC7749490; doi:10.4103/1673-5374.284982), 2020-06-19
Supplement: NRR-15-2235_Suppl2.pdf [file NRR-15-2235_Suppl2.pdf]

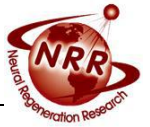

## OPEN PEER REVIEW REPORT 2

**Name of journal:** Neural Regeneration Research

**Manuscript NO:** NRR-D-20-00001

**Title:** Engineering mesenchymal stromal/stem cell-derived extracellular vesicles with improved targeting and therapeutic efficiency for the treatment of central nervous system disorders

**Reviewer's Name:** Saud A. Sadiq

**Reviewer's country:** USA

**Date sent for review:** 2020-1-11

### COMMENTS TO AUTHORS

Excellent and well written article. Very few minor comments. Perhaps when comparing to cellular therapies a word of caution should be added that EV associated therapies have not been used in human trials so their "advantages" are based on animal data. Also mention should be made whether acellular treatments despite their ability to cross the BBB may be given intrathecally with greater efficacy.
